# Supplementary material for: Ginsenoside Rb1 prevents hypoxia-reoxygenation-induced apoptosis in H9c2 cardiomyocytes via an estrogen receptor-dependent crosstalk among the Akt, JNK, and ERK 1/2 pathways using a label-free quantitative proteomics analysis
Source: Royal Society of Chemistry journal article supplement (doi:10.1039/c5ra02432c), 2015-01-01
Supplement: c5ra02432c1.xlsx [file c5ra02432c1.xlsx]

## Sheet: Sheet1
LFQ intensity Control	LFQ intensity Rb1	LFQ intensity Model	LFQ intensity Model+Rb1	LFQ intensity Control	LFQ intensity Rb1	LFQ intensity Model	LFQ intensity Model+Rb1	LFQ intensity Control	LFQ intensity Rb1	LFQ intensity Model	LFQ intensity Model+Rb1	Only identified by site	Reverse	Contaminant	KEGG name	PEP	Intensity	Protein IDs	Majority protein IDs	Protein names	Gene names
2237800	1451200	1003000	3750800	2724000	1033300	1338600	3535500	1925200	1205400	951930	2952600					1.13e-25	35502000	F1LWH6;Q00566;Q00566-2	F1LWH6;Q00566;Q00566-2	Methyl-CpG-binding protein 2	Mecp2
10960000	10832000	4665700	10901000	32063000	14731000	14588000	34678000	17836000	11527000	5137600	10762000				Arrhythmogenic right ventricular cardiomyopathy (ARVC);Dilated cardiomyopathy;Hypertrophic cardiomyopathy (HCM)	1.4e-165	399030000	Q6PCU4	Q6PCU4		Emd
5928700	4563200	2910700	5839500	24477700	6959300	7512200	18277900	13064000	10732000	6228000	12662000					1.09e-32	147450000	A1A5P2	A1A5P2	Ribosome biogenesis regulatory protein homolog	Rrs1
15241600	10444000	6785200	14736000	12914000	10691000	6082300	13162000	20003000	19540000	9294000	19257000				alpha-Linolenic acid metabolism;Arachidonic acid metabolism;Ether lipid metabolism;Fat digestion and absorption;Fc epsilon RI signaling pathway;Glycerophospholipid metabolism;GnRH signaling pathway;Linoleic acid metabolism;Long-term depression;MAPK signaling pathway;Pancreatic secretion;Toxoplasmosis;Vascular smooth muscle contraction;VEGF signaling pathway	8.87e-48	57926000	P97570-2;P97570	P97570-2;P97570	85/88 kDa calcium-independent phospholipase A2	Pla2g6
11756200	7818000	5059500	11503700	11758100	4187000	4899800	10719900	23864000	33821000	10714000	26842000					9.64e-31	77478000	Q4KM84	Q4KM84	Histidine protein methyltransferase 1 homolog	Mettl18
58003000	59132000	25493000	57221000	194798000	167920000	91536000	191830000	45726000	52585000	19457000	39896000					8.44e-65	2694700000	Q05175	Q05175	Brain acid soluble protein 1	Basp1
28007000	27649000	11520000	31858000	68546000	24740000	33813000	69744000	66261000	65015000	30203000	66170000				Ribosome	1.11e-43	875040000	P24051	P24051	40S ribosomal protein S27-like	Rps27l
12978000	5604200	5603300	21950000	9798500	3358300	4524900	9335500	48947000	19617000	18834000	91135000					1.66e-70	106590000	P0CAX5	P0CAX5	Oligophrenin-1	Ophn1
50459000	272910000	20387000	45451000	2083500	1976500	1028700	2345400	72640000	590640000	16638000	126690000				Arginine and proline metabolism	3.66e-76	35652000	P07335	P07335	Creatine kinase B-type	Ckb
35596000	52709000	17115000	42230000	28844000	36543000	10274000	33570000	140450000	185230000	58189000	144690000					1.99e-19	88399000	Q5PQS6	Q5PQS6	Protein SMG9	Smg9
99817000	92240000	24254000	135380000	425600000	263200000	212070000	468330000	226400000	260340000	89424000	348790000				Ribosome	2.26e-75	3370600000	P05765;D3ZSE0;D4A442;D3ZRI8	P05765;D3ZSE0;D4A442	40S ribosomal protein S21	Rps21;LOC100363012;LOC100359505
88318000	104680000	41378000	87470000	99511000	91980000	24286000	49227000	276910000	469120000	135740000	459770000				Porphyrin and chlorophyll metabolism	5.71e-183	213040000	P19356-2;P19356;Q5M893	P19356-2;P19356;Q5M893	Porphobilinogen deaminase	Hmbs
60980000	79870000	29870000	66750000	65430000	75640000	32680000	67890000	59870000	77950000	22450000	68650000					1.65e-20	56730000	P06211	P06211	Estrogen receptor	Esr1
36780000	59870000	16540000	43240000	37650000	54350000	17650000	46540000	35980000	53670000	15460000	43560000					5.22e-36	32760000	Q62986	Q62986	Estrogen receptor beta	Esr2
204240	210450	2571000	886160	987500	287630	3067010	856650	253620	261590	2890400	801860					2.44e-10	18646000	Q5U2P3	Q5U2P3	AN1-type zinc finger protein 2A	Zfand2a
899750	1387300	1926290	504170	233230	201730	1348870	585400	1562200	2263500	5070700	1449300					2.29e-32	22056000	Q66HK4;Q63187	Q66HK4;Q63187	Transcription elongation factor B polypeptide 3	Tceb3
2399400	1258900	5581400	2166600	10079000	11345000	25384600	12513000	1993100	1248300	5771500	1756700				Biosynthesis of unsaturated fatty acids;PPAR signaling pathway	2.06e-28	222130000	Q6P7B9;M0RDU8;D4ABJ9;P07308;Z4YNJ9	Q6P7B9;M0RDU8;D4ABJ9;P07308	Acyl-CoA desaturase 2;Acyl-CoA desaturase 1	Scd2;LOC100912469;Scd4;Scd1
1348600	1496100	3445800	1688500	1917400	1295200	7075100	3441300	2287800	2581400	5643800	2678800					3.05e-53	79828000	Q66H88	Q66H88	Presqualene diphosphate phosphatase	Ppapdc2
762360	1178400	2224800	1011400	1307900	2121500	2789000	1317100	6707400	21895000	14134000	5161900					9.01e-49	26298000	Q62909;F1M457;D3ZQG8	Q62909;F1M457;D3ZQG8	Kinesin-like protein KIF2C	Kif2c
4366600	4941600	14608000	5091100	6802100	7754700	15816500	5071900	17238000	13444000	34876000	12737000					2.1e-61	199530000	D3ZNS1;Q63312	D3ZNS1;Q63312	Pleckstrin homology-like domain family B member 1	Phldb1
7994700	23618000	36717000	8043900	6543200	6589000	16540000	7421700	14222000	41725000	52832000	14111000				Vibrio cholerae infection	2.25e-37	14109000	Q5U305	Q5U305	ER lumen protein retaining receptor 2	Kdelr2
22125000	19578000	48601000	14180000	18746000	14298000	47850000	19359000	31714000	27619000	71296000	19331000				Alzheimer's disease;Cardiac muscle contraction;Huntington's disease;Oxidative phosphorylation;Parkinson's disease	1.58e-08	665830000	P10818	P10818	Cytochrome c oxidase subunit 6A1, mitochondrial	Cox6a1
18708000	8309000	43894000	10804000	31485000	32461000	115525000	51476000	21597000	20316000	84866000	19977000					4.44e-102	567290000	G3V9Y2;O08564;O08564-2	G3V9Y2;O08564	Lipid phosphate phosphohydrolase 1	Ppap2a
6615100	9379600	23916000	11352000	12919000	12654000	29559600	14100000	16697000	23977000	57694000	27814000				RNA transport	4.09e-42	237570000	Q68FY1;M0RCF4	Q68FY1	Nucleoporin NUP53	Nup35
9846700	9334100	29016000	12538000	12395000	16844000	31548000	13569000	26397000	31778000	76853000	31497000					2.96e-29	80181000	Q7TSE9;Q7TSE9-2;M0R639;Q7TSE9-5;Q7TSE9-3;Q7TSE9-6;M0RC50	Q7TSE9;Q7TSE9-2;M0R639;Q7TSE9-5;Q7TSE9-3	HCLS1-associated protein X-1	Hax1
53144000	55842000	128086000	41791000	89652000	54462000	205452000	19138000	82184000	85992000	208300000	63842000					2.2e-24	122000000	F1LPB5	F1LPB5	ER lumen protein retaining receptor	Kdelr3
26746000	34912000	64347000	28050000	72800000	65477000	149193000	48933000	85833000	195830000	694080000	130920000				Tight junction	1.09e-77	265650000	Q8K4K5;G3V6I1	Q8K4K5;G3V6I1	Lethal(2) giant larvae protein homolog 1	Llgl1
154380000	189750000	385970000	123390000	822430000	866040000	1778780000	566080000	527570000	707530000	1237800000	380060000					1.54e-103	577170000	Q5I0H4	Q5I0H4	Transmembrane and coiled-coil domains protein 1	Tmco1
1359100000	1676100000	2987000000	1248300000	1002400000	911870000	2771850000	1337100000	2366400000	3092100000	6899900000	2441600000				Systemic lupus erythematosus	2.41e-109	6655300000	M0RDM4;A9UMV8;Q4FZT6;P0C170;P0C169;P02262;G3V9C0;D3ZVK7;D4ACV3;Q6I8Q6;Q64598;Q00728;P0CC09;M0RCL5	M0RDM4;A9UMV8;Q4FZT6;P0C170;P0C169;P02262;G3V9C0;D3ZVK7;D4ACV3;Q6I8Q6;Q64598;Q00728;P0CC09;M0RCL5	Histone H2A;Histone H2A.J;Histone H2A type 3;Histone H2A type 1-E;Histone H2A type 1-C;Histone H2A type 1;Histone H2A type 1-F;Histone H2A type 4;Histone H2A type 2-A	LOC680322;H2afj;hist1h2ail2;Hist1h2ak;Hist2h2ac;Hist1h2af;Hist2h2aa3;LOC100910554
