# Supplementary material for: Ginsenoside Rb1 prevents hypoxia-reoxygenation-induced apoptosis in H9c2 cardiomyocytes via an estrogen receptor-dependent crosstalk among the Akt, JNK, and ERK 1/2 pathways using a label-free quantitative proteomics analysis
Source: Royal Society of Chemistry journal article supplement (doi:10.1039/c5ra02432c), 2015-01-01
Supplement: c5ra02432c2.pdf [file c5ra02432c2.pdf]

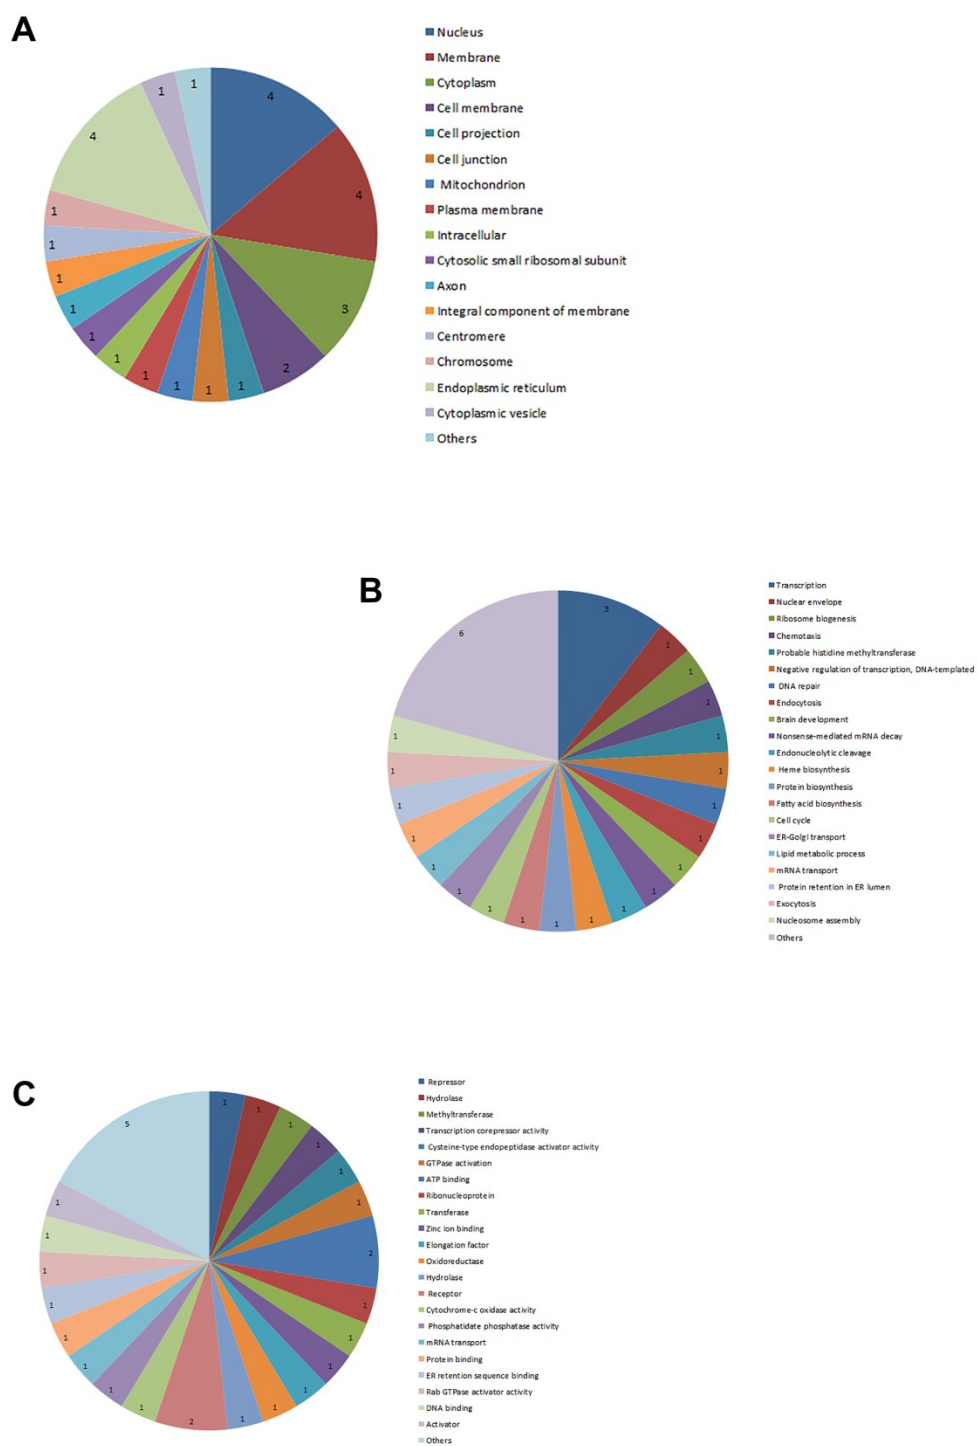

**Supplementary Information Fig. 1.** Differential proteins obtained by label-free quantification.

H9c2 cells were exposed to hypoxia for 6 h followed by reoxygenation for 24h. (A) Proteins were classified into several significant groups of cellular components. (B) Proteins were classified into several significant groups according to biological process. (C) Proteins were classified into several

significant groups according to molecular function. The results are from three independent experiments.

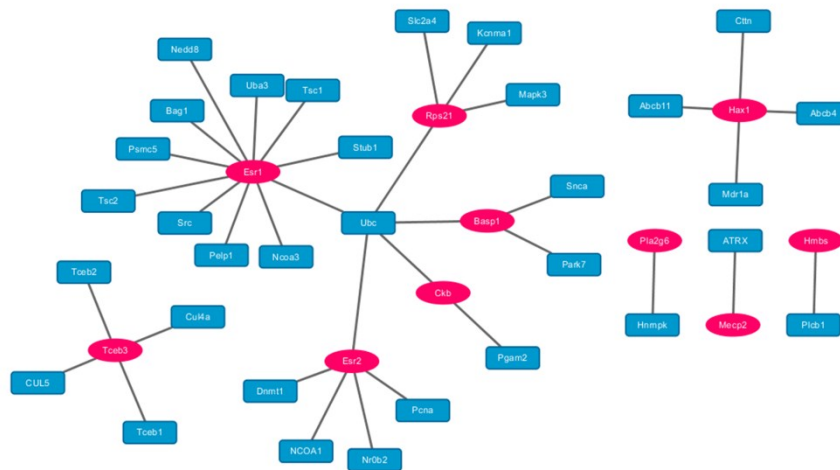

**Supplementary Information Fig. 2.** Establishment of signal network of Ginsenoside Rb1. The constructed minimum protein–protein interaction network, including ER $\alpha$ , ER $\beta$ , and signal-related proteins of Rb1 found in the proteomic study.
